# Supplementary material for: Nigeria Anopheles Vector Database: An Overview of 100 Years' Research
Source: PLoS One. 2011 Dec 5;6(12):e28347. doi: 10.1371/journal.pone.0028347 (PMC3230596; doi:10.1371/journal.pone.0028347)
Supplement: Table S5 — Number of specimen of Anopeles gambiae s.s. M form and S form from 2000–2010. (XLSX) [file pone.0028347.s005.xlsx]

## Sheet: Sheet1
Table S5: Number of specimen of Anopeles gambiae s.s. M form and S form from 2000-2010
Locality	number of M Form	number of S Form	Author	References
Idi-iroko, Ipokia, Alakia, Masifa	305	593	Awolola et al 2003	[97]
Gwade	16	140	Awolola et al 2005b	[31]
Ibadan	62	98	Awolola et al 2005b	[31]
Ikara	17	108	Awolola et al 2005b	[31]
Ilara	186	121	Awolola et al 2005b	[31]
Iworo	189	88	Awolola et al 2005b	[31]
Kainji area (Lesugbe)	19	135	Awolola et al 2005b	[31]
Lagos	120	93	Awolola et al 2005b	[31]
Masifa	101	160	Awolola et al 2005b	[31]
Monai	0	172	Awolola et al 2005b	[31]
Oji	39	100	Awolola et al 2005b	[31]
Owena	101	104	Awolola et al 2005b	[31]
Sabo	0	135	Awolola et al 2005b	[31]
Yola	0	148	Awolola et al 2005b	[31]
Alakia	1005	1845	Awolola et al 2007b	[31]
Ibadan	30	0	Djouaka et al 2007	[104]
Ibadan	30	0	Djouaka et al 2007	[104]
Ibadan	30	0	Djouaka et al 2007	[104]
Ibadan	30	0	Djouaka et al 2007	[104]
Ibadan	60	0	Djouaka et al 2008	[104]
Abeokuta (Lantoro)	1	6	Kristan et al., 2003	[153]
Abeokuta (Obantoro)	6	41	Kristan et al., 2003	[153]
Aiyetoro	18	2	Kristan et al., 2003	[153]
Kobape	16	63	Kristan et al., 2003	[153]
Olugbo	6	23	Kristan et al., 2003	[153]
Calabar	2	41	Onyabe et al., 2003	[30]
Epe	453	0	Oyewole et al., 2010	[27]
Iworo	637	0	Oyewole et al., 2010	[27]
Moba	371	0	Oyewole et al., 2010	[27]
Kobape, Olugbo	41	49	Santolamazza et al 2008	[100]
Ibadan	224	666	Awolola et al., 2003b	[98]
Agege	29	2	Oduola et al., 2010	[101]
Akodo	7	0	Oduola et al., 2010	[101]
Akoka	10	0	Oduola et al., 2010	[101]
Akufo	27	0	Oduola et al., 2010	[101]
Amuwo-Odofin	63	0	Oduola et al., 2010	[101]
Awuru	2	0	Oduola et al., 2010	[101]
Bariga	52	0	Oduola et al., 2010	[101]
Ebute Metta	12	0	Oduola et al., 2010	[101]
Elewi Odo	39	6	Oduola et al., 2010	[101]
Ikere	15	5	Oduola et al., 2010	[101]
Ikorodu	87	0	Oduola et al., 2010	[101]
Isalu	24	7	Oduola et al., 2010	[101]
Kainji area	13	0	Oduola et al., 2010	[101]
Monai	54	0	Oduola et al., 2010	[101]
N Eruwa	15	6	Oduola et al., 2010	[101]
Ogudu	2	0	Oduola et al., 2010	[101]
Oko Agric	19	8	Oduola et al., 2010	[101]
Yaba area	29	0	Oduola et al., 2010	[101]
Kobape		7	Pinto et al., 2007	[173]
Olugbo		8	Pinto et al., 2007	[173]
Total	4614	4980
